# Supplementary material
Source: publisher figshare collection journal article supplement (https://acs.figshare.com/ndownloader/files/4697077)
Supplement: Supplementary file 1 [file 4697077]

## **Supporting Information For:**

### **Reagents for Astatination of Biomolecules. 2. Conjugation of Anionic Boron Cage Pendant Groups to a Protein Provides a Method for Direct Labeling that is Stable to In Vivo Deastatination.**

D. Scott Wilbur<sup>\*,†</sup>, Ming-Kuan Chyan<sup>†</sup>, Donald K. Hamlin<sup>†</sup>, Robert L. Vessella<sup>‡</sup>,  
Timothy J. Wedge<sup>¶</sup>, and M. Frederick Hawthorne<sup>¶</sup>

Departments of <sup>†</sup>Radiation Oncology, and <sup>‡</sup>Urology,  
University of Washington, Seattle, WA 98195

<sup>¶</sup>Department of Chemistry and Biochemistry,  
University of California, Los Angeles, CA

PAGES:

**Figure S1:** SE-HPLC chromatograms for conjugation of varying quantities of **2** with Fab'-NEM

**Figure S2:** IEF gels showing pI changes of Fab'-NEM when borane derivatives are conjugated

**Table S1:** Biodistribution of directly radioiodinated [<sup>125</sup>I]Fab'-NEM at 1, 4, and 24 h pi

**Table S2:** Biodistribution of [<sup>125</sup>I]**1b**-Fab' and [<sup>211</sup>At]**1c**-Fab' at 1 and 4 h pi

**Table S3:** Biodistribution of [<sup>125</sup>I]**2**-Fab' and [<sup>211</sup>At]**2**-Fab' at 1 and 4 h pi

**Table S4:** Biodistribution of [<sup>125</sup>I]**3**-Fab' and [<sup>211</sup>At]**3**-Fab' at 1 and 4 h pi

**Table S5:** Biodistribution of [<sup>125</sup>I]**4**-Fab' and [<sup>211</sup>At]**4**-Fab' at 1 and 4 h pi

**Table S6:** Biodistribution of [<sup>125</sup>I]**5**-Fab' and [<sup>211</sup>At]**5**-Fab' at 1, 4 and 24 h pi

**Table S7:** Biodistribution of [<sup>125</sup>I]**6**-Fab' and [<sup>211</sup>At]**6**-Fab' at 1 and 4 h pi

**Table S8:** Biodistribution of [<sup>125</sup>I]**7**-Fab' and [<sup>211</sup>At]**7**-Fab' at 1, 4 and 24 h pi

### Figure S1:

SE-HPLC chromatograms for the reactions of 107-1A4 Fab'-NEM with 10 equiv. (panel A), 20 equiv. (panel B) and 50 equiv. (panel C) of *nido*-carboranyl derivative **2**. Note the growth of high molecular weight species ( $t_R = 6.3$  min) and broadened Fab'-NEM peak (e.g.  $t_R = 10-11$  min) with increased amounts of **2** in the reaction.

#### A: 10 equivalents of **2**

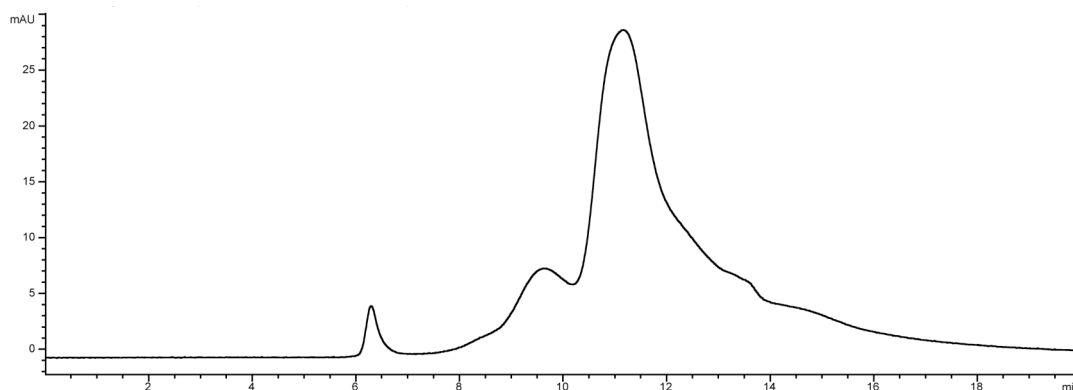

#### B: 20 equivalents of **2**

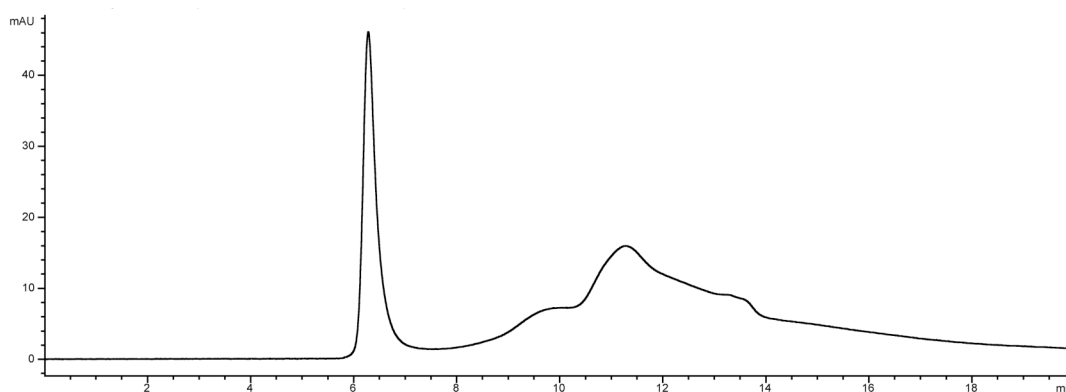

#### C: 50 equivalents of **2**

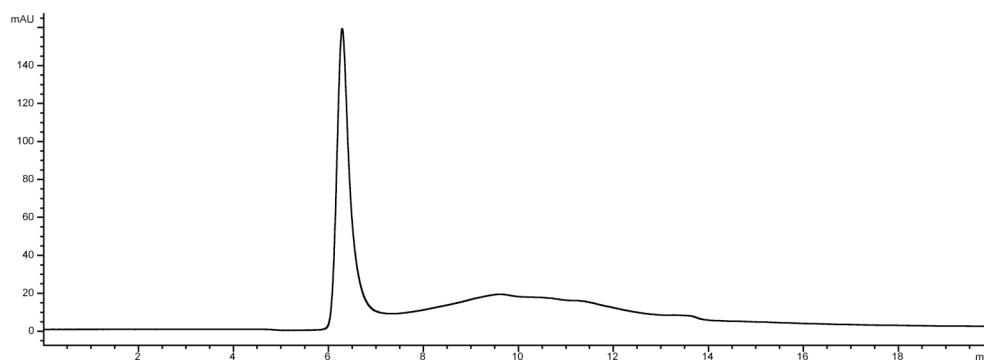

## Figure S2:

Digitized representations of isoelectric focusing gels running conjugation reaction products of borane reagents **3,4,5,6** and **14** with Fab'-NEM. Standards used are described in manuscript. Inclusion of Fab'-NEM allows comparison to starting material. If no bands remain for starting material, it is thought that every Fab' has at least one conjugate. Note that IEF in panel A is run from pI of 10.7 to 3.5, whereas in panel B the pI range is 7.4 to 3.5.

**A:**

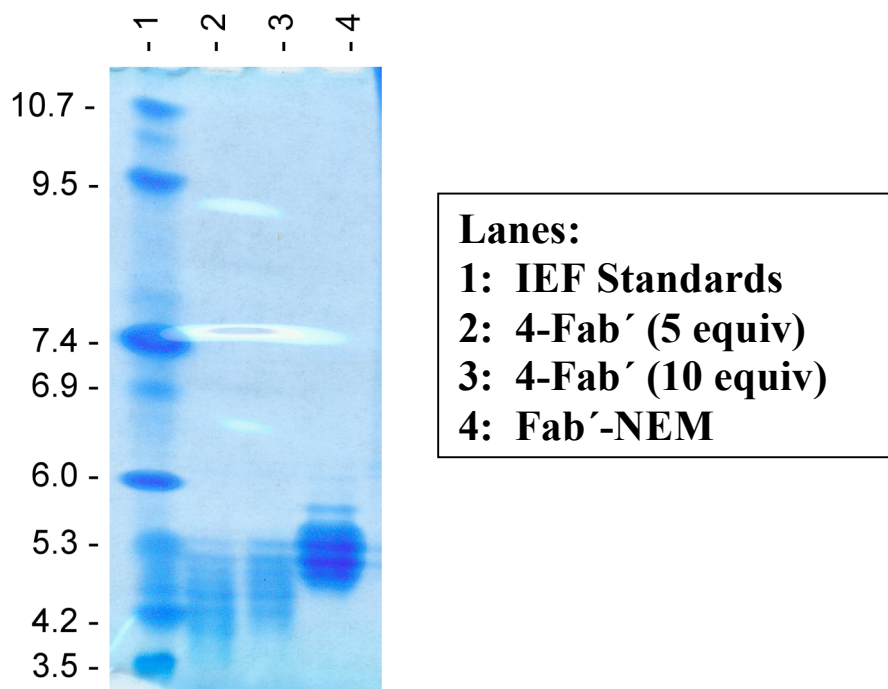

**B:**

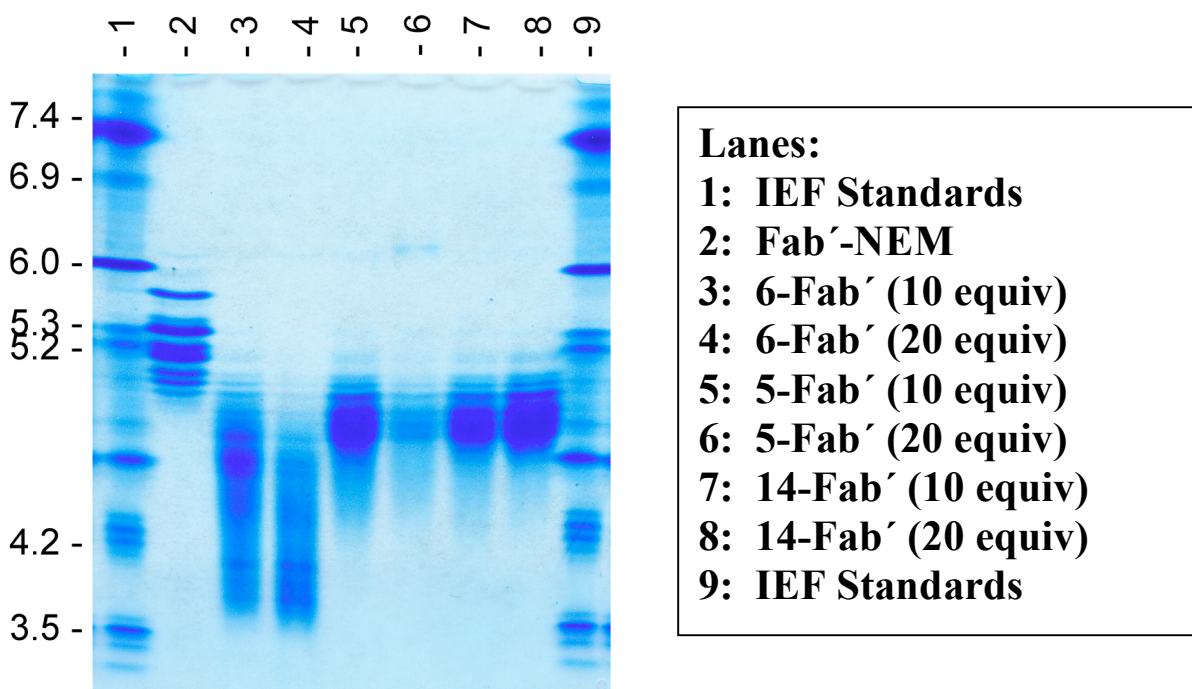

**Table S1: Tissue Distribution of [<sup>125</sup>I]Fab'-NEM in BALB/c nu/nu mice.<sup>a</sup>**

| Tissue             | <u>1 h</u> <sup>b,c</sup> | <u>4 h</u>              | <u>24 h</u>             |
|--------------------|---------------------------|-------------------------|-------------------------|
|                    | [ <sup>125</sup> I]Fab'   | [ <sup>125</sup> I]Fab' | [ <sup>125</sup> I]Fab' |
| blood              | 14.76 ± 0.06              | 9.10 ± 1.50             | 1.25 ± 0.20             |
| muscle             | 0.99 ± 0.11               | 1.09 ± 0.01             | 0.21 ± 0.01             |
| lung               | 7.33 ± 1.09               | 5.01 ± 0.78             | 0.86 ± 0.09             |
| kidney             | 47.58 ± 5.14              | 22.99 ± 5.79            | 4.61 ± 0.64             |
| spleen             | 3.33 ± 0.61               | 2.51 ± 0.32             | 0.54 ± 0.10             |
| liver              | 3.30 ± 0.13               | 2.18 ± 0.27             | 0.84 ± 0.26             |
| intestine          | 2.10 ± 0.25               | 1.75 ± 0.20             | 0.22 ± 0.03             |
| neck               | 6.84 ± 0.50               | 11.58 ± 3.79            | 0.99 ± 0.13             |
| stomach            | 3.97 ± 0.81               | 8.79 ± 2.32             | 0.59 ± 0.07             |
| urine <sup>d</sup> | 16.22 ± 2.70              | 53.48 ± 24.36           | 4.34 ± 2.68             |

<sup>a</sup>Values shown are % injected dose / gram ± standard deviation. Fab'-SH is capped with N-ethylmaleimide. <sup>b</sup>Time of sacrifice from injection of radioactivity. <sup>c</sup>Data were obtained for *n* = 3 mice at 1 h, 4 mice at 4 h and 5 mice at 24 h; average animal weight for all groups is 26.32 ± 2.18 G; Injectate for each animal had 5 µCi/15 µg of [<sup>125</sup>I]Fab' in approximately 100 µL of 0.9% sterile saline. <sup>d</sup>Urine was collected by syringe bladder tap after sacrifice.

**Table S2: Tissue Distribution of Co-injected [<sup>125</sup>I]1b-Fab' and [<sup>211</sup>At]1c-Fab' in BALB/c nu/nu mice.<sup>a</sup>**

| Tissue             | <u>1 h</u> <sup>b,c</sup>       |                                  | <u>4 h</u>                      |                                  |
|--------------------|---------------------------------|----------------------------------|---------------------------------|----------------------------------|
|                    | <u>[<sup>125</sup>I]1b-Fab'</u> | <u>[<sup>211</sup>At]1c-Fab'</u> | <u>[<sup>125</sup>I]1b-Fab'</u> | <u>[<sup>211</sup>At]1c-Fab'</u> |
| blood              | 19.21 ± 1.17                    | 13.55 ± 0.97                     | 7.41 ± 0.53                     | 6.65 ± 0.54                      |
| muscle             | 0.76 ± 0.13                     | 1.12 ± 0.10                      | 0.82 ± 0.09                     | 0.90 ± 0.04                      |
| lung               | 6.72 ± 0.62                     | 14.32 ± 1.04                     | 4.29 ± 0.24                     | 11.67 ± 0.50                     |
| kidney             | 33.61 ± 6.43                    | 20.83 ± 3.03                     | 30.89 ± 5.30                    | 16.95 ± 2.35                     |
| spleen             | 3.04 ± 0.50                     | 9.43 ± 1.71                      | 1.68 ± 0.13                     | 10.49 ± 1.39                     |
| liver              | 4.20 ± 0.24                     | 3.89 ± 0.16                      | 2.90 ± 0.18*                    | 2.70 ± 0.23*                     |
| intestine          | 1.86 ± 0.60*                    | 2.47 ± 0.53*                     | 6.51 ± 3.09                     | 3.02 ± 0.34                      |
| neck               | 3.01 ± 0.40                     | 14.66 ± 2.05                     | 2.68 ± 0.10                     | 29.41 ± 4.80                     |
| stomach            | 1.94 ± 0.35                     | 12.09 ± 2.43                     | 2.36 ± 0.13                     | 17.19 ± 1.84                     |
| urine <sup>d</sup> | 69.66 ± 78.58*                  | 20.75 ± 30.57*                   | 27.41 ± 15.54*                  | 20.67 ± 21.23*                   |

<sup>a</sup>Values shown are % injected dose / gram ± standard deviation. Fab'-SH is capped with N-ethylmaleimide. <sup>b</sup>Time of sacrifice from injection of radioactivity. <sup>c</sup>Data were obtained for *n* = 5 mice at 1 h and *n* = 5 mice at 4 h; average animal weight for 1 h group, 30.93 ± 3.81 g, and for 4 h group, 30.02 ± 1.65 g; Injectate for each animal had 3 µCi/15 µg of [<sup>211</sup>At]1c-Fab' and 8 µCi/15 µg of [<sup>125</sup>I]1b-Fab' in approximately 100 µL of 0.9% sterile saline. <sup>d</sup>Urine was collected by syringe bladder tap after sacrifice. \*Denotes tissues/fluids that are **not** statistically different based on paired Student-t test (p>0.05).

**Table S3: Tissue Distribution of Co-injected [<sup>125</sup>I]2-Fab' and [<sup>211</sup>At]2-Fab' in BALB/c nu/nu mice.<sup>a</sup>**

| Tissue             | <u>1 h</u> <sup>b,c</sup>      |                                 | <u>4 h</u>                     |                                 |
|--------------------|--------------------------------|---------------------------------|--------------------------------|---------------------------------|
|                    | <u>[<sup>125</sup>I]2-Fab'</u> | <u>[<sup>211</sup>At]2-Fab'</u> | <u>[<sup>125</sup>I]2-Fab'</u> | <u>[<sup>211</sup>At]2-Fab'</u> |
| blood              | 33.68 ± 3.49*                  | 27.03 ± 2.71*                   | 22.86 ± 1.73*                  | 19.06 ± 1.39*                   |
| muscle             | 0.72 ± 0.15                    | 0.76 ± 0.10                     | 1.11 ± 0.13                    | 0.98 ± 0.14                     |
| lung               | 10.88 ± 3.16                   | 11.47 ± 1.99                    | 8.55 ± 0.98                    | 9.08 ± 0.49                     |
| kidney             | 12.84 ± 1.51                   | 11.07 ± 1.33                    | 11.89 ± 1.71                   | 11.96 ± 1.66                    |
| spleen             | 4.45 ± 0.24*                   | 7.59 ± 0.81*                    | 3.96 ± 0.39*                   | 5.94 ± 0.40*                    |
| liver              | 7.71 ± 1.07                    | 7.72 ± 0.96                     | 5.93 ± 0.62                    | 6.43 ± 0.71                     |
| intestine          | 2.17 ± 0.49                    | 2.52 ± 0.57                     | 3.94 ± 0.14*                   | 5.81 ± 0.22*                    |
| neck               | 3.19 ± 0.55*                   | 5.98 ± 0.94*                    | 5.72 ± 1.22*                   | 9.07 ± 2.35*                    |
| stomach            | 1.84 ± 0.30*                   | 3.87 ± 0.64*                    | 3.96 ± 0.38*                   | 5.36 ± 0.91*                    |
| urine <sup>d</sup> | 3.71 ± 0.23                    | 3.73 ± 0.50                     | 28.26 ± 3.52*                  | 17.05 ± 2.85*                   |

<sup>a</sup>Values shown are % injected dose / gram ± standard deviation. Fab'-SH is capped with N-ethylmaleimide. <sup>b</sup>Time of sacrifice from injection of radioactivity. <sup>c</sup>Data were obtained for *n* = 5 mice at 1 h and *n* = 5 mice at 4 h; average animal weight for 1 h group, 28.34 ± 2.38 g, and for 4 h group, 28.58 ± 2.16 g; Injectate for each animal had 5 µCi/10 µg of [<sup>211</sup>At]2-Fab' and 5 µCi/10 µg of [<sup>125</sup>I]2-Fab' in approximately 100 µL of 0.9% sterile saline. <sup>d</sup>Urine was collected by syringe bladder tap after sacrifice. \*Denotes tissues/fluids that are statistically different based on paired Student-t test (p>0.05).

**Table S4: Tissue Distribution of Co-injected [ $^{125}\text{I}$ ]3-Fab' and [ $^{211}\text{At}$ ]3-Fab' in BALB/c nu/nu mice.<sup>a</sup>**

| Tissue             | <u>1 h</u> <sup>b,c</sup>                  |                                             | <u>4 h</u>                                 |                                             |
|--------------------|--------------------------------------------|---------------------------------------------|--------------------------------------------|---------------------------------------------|
|                    | <u>[<math>^{125}\text{I}</math>]3-Fab'</u> | <u>[<math>^{211}\text{At}</math>]3-Fab'</u> | <u>[<math>^{125}\text{I}</math>]3-Fab'</u> | <u>[<math>^{211}\text{At}</math>]3-Fab'</u> |
| blood              | 13.77 $\pm$ 0.90*                          | 10.51 $\pm$ 0.66*                           | 9.04 $\pm$ 0.62*                           | 6.63 $\pm$ 0.45*                            |
| muscle             | 0.46 $\pm$ 0.09                            | 0.58 $\pm$ 0.08                             | 0.57 $\pm$ 0.07*                           | 0.37 $\pm$ 0.10*                            |
| lung               | 4.73 $\pm$ 0.32*                           | 7.79 $\pm$ 0.31*                            | 4.79 $\pm$ 0.39*                           | 5.52 $\pm$ 0.35*                            |
| kidney             | 4.12 $\pm$ 0.69                            | 4.57 $\pm$ 0.30                             | 4.04 $\pm$ 0.14                            | 3.72 $\pm$ 0.32                             |
| spleen             | 13.97 $\pm$ 7.46                           | 17.35 $\pm$ 9.11                            | 13.77 $\pm$ 2.34                           | 16.82 $\pm$ 2.48                            |
| liver              | 26.92 $\pm$ 1.21                           | 25.57 $\pm$ 1.24                            | 33.96 $\pm$ 3.87                           | 32.15 $\pm$ 3.66                            |
| intestine          | 2.49 $\pm$ 3.91                            | 3.38 $\pm$ 5.33                             | 8.28 $\pm$ 1.90                            | 8.46 $\pm$ 1.91                             |
| neck               | 3.45 $\pm$ 0.37*                           | 6.14 $\pm$ 1.15*                            | 4.49 $\pm$ 1.03*                           | 8.59 $\pm$ 1.49*                            |
| stomach            | 1.75 $\pm$ 0.13*                           | 3.70 $\pm$ 1.03*                            | 3.28 $\pm$ 0.89*                           | 7.26 $\pm$ 0.58*                            |
| urine <sup>d</sup> | 2.48 $\pm$ 0.61                            | 2.77 $\pm$ 0.76                             | 16.48 $\pm$ 6.97                           | 10.11 $\pm$ 1.12                            |

<sup>a</sup>Values shown are % injected dose / gram  $\pm$  standard deviation. Fab'-SH is capped with N-ethylmaleimide. <sup>b</sup>Time of sacrifice from injection of radioactivity. <sup>c</sup>Data were obtained for  $n = 5$  mice at 1 h and  $n = 5$  mice at 4 h; average animal weight for 1 h group, 28.38  $\pm$  1.47g, and for 4 h group, 26.72  $\pm$  1.69 g; Injectate for each animal had 2  $\mu\text{Ci}/5 \mu\text{g}$  of [ $^{211}\text{At}$ ]3-Fab' and 2  $\mu\text{Ci}/5 \mu\text{g}$  of [ $^{125}\text{I}$ ]3-Fab' in approximately 100  $\mu\text{L}$  of 0.9% sterile saline. <sup>d</sup>Urine was collected by syringe bladder tap after sacrifice. \*Denotes tissues/fluids that are statistically different based on paired Student-t test ( $p > 0.05$ ).

**Table S5: Tissue Distribution of Co-injected [<sup>125</sup>I]4-Fab' and [<sup>211</sup>At]4-Fab' in BALB/c nu/nu mice.<sup>a</sup>**

| Tissue             | <u>1 h</u> <sup>b,c</sup>      |                                 | <u>4 h</u>                     |                                 |
|--------------------|--------------------------------|---------------------------------|--------------------------------|---------------------------------|
|                    | <u>[<sup>125</sup>I]4-Fab'</u> | <u>[<sup>211</sup>At]4-Fab'</u> | <u>[<sup>125</sup>I]4-Fab'</u> | <u>[<sup>211</sup>At]4-Fab'</u> |
| blood              | 25.09 ± 1.71                   | 26.61 ± 1.73                    | 11.69 ± 2.53                   | 13.87 ± 2.99                    |
| muscle             | 0.84 ± 0.07                    | 0.84 ± 0.11                     | 0.72 ± 0.10                    | 0.82 ± 0.14                     |
| lung               | 8.57 ± 0.62*                   | 9.95 ± 0.73*                    | 5.41 ± 1.33                    | 6.94 ± 1.47                     |
| kidney             | 23.80 ± 3.50                   | 24.62 ± 3.87                    | 27.41 ± 6.43                   | 29.55 ± 6.79                    |
| spleen             | 5.44 ± 0.62*                   | 6.58 ± 0.93*                    | 3.73 ± 0.32*                   | 4.98 ± 0.18*                    |
| liver              | 10.35 ± 0.91                   | 11.61 ± 1.07                    | 10.78 ± 1.82                   | 11.93 ± 1.99                    |
| intestine          | 2.23 ± 0.32                    | 2.59 ± 0.46                     | 2.58 ± 0.46*                   | 4.96 ± 1.30*                    |
| neck               | 7.51 ± 1.16*                   | 3.72 ± 0.80*                    | 6.51 ± 1.97*                   | 4.12 ± 0.71*                    |
| stomach            | 5.43 ± 0.92*                   | 2.72 ± 0.21*                    | 4.86 ± 1.34*                   | 3.20 ± 0.23*                    |
| urine <sup>d</sup> | 41.52 ± 19.43                  | 37.13 ± 17.58                   | 47.34 ± 10.63*                 | 27.62 ± 8.51*                   |

<sup>a</sup>Values shown are % injected dose / gram ± standard deviation. Fab'-SH is capped with N-ethylmaleimide. <sup>b</sup>Time of sacrifice from injection of radioactivity. <sup>c</sup>Data were obtained for *n* = 5 mice at 1 h and *n* = 5 mice at 4 h; average animal weight for 1 h group, 29.92 ± 1.23g, and for 4 h group, 25.11 ± 3.62 g; Injectate for each animal had 2 µCi/15 µg of [<sup>211</sup>At]4-Fab' and 5 µCi/15 µg of [<sup>125</sup>I]4-Fab' in approximately 100 µL of 0.9% sterile saline. <sup>d</sup>Urine was collected by syringe bladder tap after sacrifice. \*Denotes tissues/fluids that are statistically different based on paired Student-t test (p>0.05).



**Table S6: Tissue Distribution of Co-injected [<sup>125</sup>I]5-Fab' and [<sup>211</sup>At]5-Fab' in BALB/c nu/nu mice.<sup>a</sup>**

| Tissues            | <u>1h</u> <sup>b,c</sup>       |                                 | <u>4h</u>                      |                                 | <u>24h</u>                     |                                 |
|--------------------|--------------------------------|---------------------------------|--------------------------------|---------------------------------|--------------------------------|---------------------------------|
|                    | <u>[<sup>125</sup>I]5-Fab'</u> | <u>[<sup>211</sup>At]5-Fab'</u> | <u>[<sup>125</sup>I]5-Fab'</u> | <u>[<sup>211</sup>At]5-Fab'</u> | <u>[<sup>125</sup>I]5-Fab'</u> | <u>[<sup>211</sup>At]5-Fab'</u> |
| blood              | 24.84 ± 4.08*                  | 17.67 ± 1.85*                   | 12.50 ± 3.10                   | 11.86 ± 2.65                    | 2.69 ± 0.45                    | 3.07 ± 0.51                     |
| muscle             | 0.56 ± 0.11                    | 0.54 ± 0.11                     | 0.44 ± 0.10                    | 0.48 ± 0.12                     | 0.38 ± 0.10                    | 0.37 ± 0.12                     |
| lung               | 9.15 ± 1.83                    | 9.48 ± 1.97                     | 5.18 ± 1.46                    | 6.00 ± 1.66                     | 1.87 ± 0.41                    | 2.37 ± 0.45                     |
| kidney             | 10.26 ± 2.03                   | 10.85 ± 2.06                    | 6.63 ± 1.48                    | 8.08 ± 1.82                     | 4.53 ± 0.83                    | 5.71 ± 1.06                     |
| spleen             | 7.46 ± 1.73                    | 8.19 ± 1.92                     | 9.91 ± 2.30                    | 10.38 ± 2.29                    | 17.59 ± 5.35                   | 18.01 ± 5.66                    |
| liver              | 9.72 ± 1.42*                   | 7.45 ± 0.59*                    | 11.28 ± 2.47*                  | 6.67 ± 1.08*                    | 14.48 ± 3.08*                  | 9.20 ± 1.14*                    |
| intestine          | 1.98 ± 0.60                    | 2.43 ± 0.87                     | 1.31 ± 0.36                    | 1.63 ± 0.46                     | 0.89 ± 0.12*                   | 1.18 ± 0.18*                    |
| neck               | 5.93 ± 0.79*                   | 2.76 ± 0.41*                    | 5.00 ± 1.05*                   | 3.30 ± 0.64*                    | 2.97 ± 0.76                    | 3.80 ± 1.04                     |
| stomach            | 2.71 ± 0.66*                   | 1.34 ± 0.29*                    | 2.79 ± 0.38*                   | 1.99 ± 0.45*                    | 1.63 ± 0.37                    | 1.90 ± 0.50                     |
| urine <sup>d</sup> | 12.24 ± 6.02                   | 11.26 ± 7.32                    | 15.54 ± 3.43*                  | 6.19 ± 1.47*                    | 4.78 ± 0.74*                   | 3.42 ± 0.99*                    |

<sup>a</sup>Values shown are % injected dose / gram ± standard deviation. Fab'-SH is capped with N-ethylmaleimide. <sup>b</sup>Time of sacrifice from injection of radioactivity. <sup>c</sup>Data were obtained for *n* = 5 mice at 1 h and *n* = 5 mice at 4 h; average animal weight for 1 h group, 26.81 ± 1.10 g, for 4 h group, 31.71 ± 3.90 g, and for 24 h group, 26.66 ± 2.23 g; Injectate for each animal had 15 µCi/15 µg of [<sup>211</sup>At]5-Fab' and 15 µCi/15 µg of [<sup>125</sup>I]5-Fab' in approximately 100 µL of 0.9% sterile saline. <sup>d</sup>Urine was collected by syringe bladder tap after sacrifice. \*Denotes tissues/fluids that are statistically different based on paired Student-t test (p>0.05).

**Table S7: Tissue Distribution of Co-injected [<sup>125</sup>I]6-Fab' and [<sup>211</sup>At]6-Fab' in BALB/c nu/nu mice.<sup>a</sup>**

| Tissue             | <u>1 h</u> <sup>b,c</sup>      |                                 | <u>4 h</u>                     |                                 |
|--------------------|--------------------------------|---------------------------------|--------------------------------|---------------------------------|
|                    | <u>[<sup>125</sup>I]6-Fab'</u> | <u>[<sup>211</sup>At]6-Fab'</u> | <u>[<sup>125</sup>I]6-Fab'</u> | <u>[<sup>211</sup>At]6-Fab'</u> |
| blood              | 23.31 ± 1.85                   | 21.82 ± 1.59                    | 13.17 ± 2.41                   | 12.38 ± 2.19                    |
| muscle             | 0.72 ± 0.08                    | 0.66 ± 0.08                     | 0.73 ± 0.16                    | 0.63 ± 0.14                     |
| lung               | 7.94 ± 0.50                    | 8.51 ± 0.67                     | 5.79 ± 0.55                    | 5.90 ± 0.50                     |
| kidney             | 39.61 ± 5.58                   | 37.55 ± 4.76                    | 30.88 ± 2.20                   | 26.41 ± 1.64                    |
| spleen             | 5.56 ± 0.58*                   | 7.62 ± 0.92*                    | 4.29 ± 0.66                    | 4.50 ± 0.62                     |
| liver              | 10.58 ± 0.89*                  | 13.58 ± 1.36*                   | 13.41 ± 1.98                   | 11.81 ± 1.85                    |
| intestine          | 2.06 ± 0.32                    | 2.24 ± 0.48                     | 3.18 ± 1.07                    | 4.91 ± 2.11                     |
| neck               | 3.53 ± 0.15                    | 3.36 ± 0.10                     | 9.13 ± 2.66*                   | 4.53 ± 0.84*                    |
| stomach            | 2.07 ± 0.12                    | 2.00 ± 0.19                     | 4.17 ± 2.43                    | 2.09 ± 1.06                     |
| urine <sup>d</sup> | 68.37 ± 27.01                  | 65.10 ± 24.83                   | 99.48 ± 124.10                 | 41.90 ± 45.66                   |

<sup>a</sup>Values shown are % injected dose / gram ± standard deviation. Fab'-SH is capped with N-ethylmaleimide. <sup>b</sup>Time of sacrifice from injection of radioactivity. <sup>c</sup>Data were obtained for *n* = 5 mice at 1 h and *n* = 5 mice at 4 h; average animal weight for 1 h group, 27.98 ± 3.22g, and for 4 h group, 28.59 ± 2.11 g; Injectate for each animal had 4 µCi/15 µg of [<sup>211</sup>At]6-Fab' and 4 µCi/15 µg of [<sup>125</sup>I]6-Fab' in approximately 100 µL of 0.9% sterile saline. <sup>d</sup>Urine was collected by syringe bladder tap after sacrifice. \*Denotes tissues/fluids that are statistically different based on paired Student-t test (p>0.05).

**Table S8: Tissue Distribution of Co-injected [<sup>125</sup>I]7-Fab' and [<sup>211</sup>At]7-Fab' in BALB/c nu/nu mice.<sup>a</sup>**

| Tissues            | <u>1h</u> <sup>b,c</sup>       |                                 | <u>4h</u>                      |                                 | <u>24h</u>                     |                                 |
|--------------------|--------------------------------|---------------------------------|--------------------------------|---------------------------------|--------------------------------|---------------------------------|
|                    | <u>[<sup>125</sup>I]7-Fab'</u> | <u>[<sup>211</sup>At]7-Fab'</u> | <u>[<sup>125</sup>I]7-Fab'</u> | <u>[<sup>211</sup>At]7-Fab'</u> | <u>[<sup>125</sup>I]7-Fab'</u> | <u>[<sup>211</sup>At]7-Fab'</u> |
| blood              | 17.62 ± 2.22*                  | 21.74 ± 2.47*                   | 10.15 ± 2.86                   | 14.20 ± 3.76                    | 1.35 ± 0.25*                   | 2.33 ± 0.29*                    |
| muscle             | 0.95 ± 0.24                    | 0.97 ± 0.26                     | 0.60 ± 0.18                    | 0.71 ± 0.18                     | 0.26 ± 0.02                    | 0.29 ± 0.11                     |
| lung               | 7.53 ± 2.22                    | 9.36 ± 2.91                     | 3.76 ± 1.13                    | 5.29 ± 1.85                     | 0.96 ± 0.12*                   | 1.58 ± 0.31*                    |
| kidney             | 26.84 ± 1.21*                  | 31.55 ± 1.69*                   | 31.02 ± 4.74                   | 37.22 ± 5.10                    | 17.87 ± 3.23*                  | 23.09 ± 3.66*                   |
| spleen             | 4.01 ± 0.47*                   | 5.38 ± 0.54*                    | 3.31 ± 0.91                    | 4.87 ± 1.33                     | 2.94 ± 0.80*                   | 4.58 ± 1.22*                    |
| liver              | 6.60 ± 0.53*                   | 9.03 ± 0.61*                    | 6.84 ± 1.42*                   | 10.19 ± 1.96*                   | 5.97 ± 0.74*                   | 9.69 ± 1.04*                    |
| intestine          | 1.94 ± 0.36                    | 2.40 ± 0.55                     | 1.93 ± 0.72                    | 2.71 ± 1.21                     | 0.51 ± 0.11*                   | 0.88 ± 0.25*                    |
| neck               | 9.47 ± 1.43*                   | 3.08 ± 0.20*                    | 9.70 ± 3.58*                   | 5.31 ± 1.75*                    | 1.21 ± 0.33                    | 1.81 ± 0.51                     |
| stomach            | 5.36 ± 1.41*                   | 2.27 ± 0.28*                    | 6.77 ± 0.71*                   | 3.42 ± 0.44*                    | 0.68 ± 0.09*                   | 1.05 ± 0.33*                    |
| urine <sup>d</sup> | 46.03 ± 32.23                  | 44.32 ± 30.61                   | 38.33 ± 42.37                  | 12.64 ± 27.78                   | 5.90 ± 3.46                    | 5.20 ± 2.52                     |

<sup>a</sup>Values shown are % injected dose / gram ± standard deviation. <sup>b</sup>Time of sacrifice from injection of radioactivity. <sup>c</sup>Data were obtained for *n* = 5 mice at 1 h and *n* = 5 mice at 4 h; average animal weight for 1 h group, 26.81 ± 1.10 g, for 4 h group, 31.71 ± 3.90 g, and for 24 h group, 26.66 ± 2.23 g; Injectate for each animal had 10 µCi/8 µg of [<sup>211</sup>At]7-Fab' and 10 µCi/8 µg of [<sup>125</sup>I]7-Fab' in approximately 100 µL of 0.9% sterile saline.

<sup>d</sup>Urine was collected by syringe bladder tap after sacrifice. \*Denotes tissues/fluids that are statistically different based on paired Student-t test (p>0.05).
